# Supplementary material for: Thrombus Migration Paradox in Patients With Acute Ischemic Stroke
Source: PubMed Central journal article supplement — Stroke. 2019 Oct 10;50(11):3156–63. doi: 10.1161/STROKEAHA.119.026107 (PMC6824579; doi:10.1161/strokeaha.119.026107), 2019-10-10

## SUPPLEMENTAL MATERIAL

### Appendix

A list of all MR CLEAN Registry (Multicenter Randomized Clinical Trial of Endovascular Treatment of Acute Ischemic Stroke) investigators are as follows. Executive committee: Diederik W.J. Dippel (Department of Neurology, Erasmus MC University Medical Center, Rotterdam), Aad van der Lugt (Department of Radiology, Erasmus MC University Medical Center, Rotterdam), Charles B.L.M. Majoie (Department of Radiology, Academic Medical Center, Amsterdam), Yvo B.W.E.M. Roos (Department of Neurology, Academic Medical Center, Amsterdam), Robert J. van Oostenbrugge (Department of Neurology, Cardiovascular Research Institute Maastricht, Maastricht University Medical Center), Wim H. van Zwam (Department of Radiology, Cardiovascular Research Institute Maastricht, Maastricht University Medical Center), Jelis Boiten (Department of Neurology, Haaglanden MC, The Hague), Jan-Albert Vos (Department of Radiology, Sint Antonius Hospital, Nieuwegein). Study coordinators: Ivo G.H. Jansen (Department of Radiology, Academic Medical Center, Amsterdam), Maxim J.H.L. Mulder (Department of Neurology, Erasmus MC University Medical Center, Rotterdam), Robert-Jan B. Goldhoorn (Department of Neurology, Cardiovascular Research Institute Maastricht, Maastricht University Medical Center). Local principal investigators: Wouter J. Schonewille (Department of Neurology, Sint Antonius Hospital, Nieuwegein), Jan Albert Vos (Department of Radiology, Sint Antonius Hospital, Nieuwegein), Charles B.L.M. Majoie (Department of Radiology, Academic Medical Center, Amsterdam), Jonathan M. Coutinho (Department of Neurology, Academic Medical Center, Amsterdam), Marieke J.H. Wermer (Department of Neurology, Leiden University Medical Center), Marianne A.A. van Walderveen (Department of Radiology, Leiden

University Medical Center), Julie Staals (Department of Neurology, Cardiovascular Research Institute Maastricht, Maastricht University Medical Center), Wim H. van Zwam (Department of Radiology, Cardiovascular Research Institute Maastricht, Maastricht University Medical Center), Jeannette Hofmeijer (Department of Neurology, Rijnstate Hospital, Arnhem), Jasper M. Martens (Department of Radiology, Rijnstate Hospital, Arnhem), Geert J. Lycklama à Nijeholt (Department of Radiology, Haaglanden MC, The Hague), Jelis Boiten (Department of Neurology, Haaglanden MC, The Hague), Bob Roozenbeek (Department of Neurology, Erasmus MC University Medical Center, Rotterdam), Bart J. Emmer (Department of Radiology, Erasmus MC University Medical Center, Rotterdam), Sebastiaan F. de Bruijn (Department of Neurology, HAGA Hospital, The Hague), Lukas C. van Dijk (Department of Radiology, HAGA Hospital, The Hague), H. Bart van der Worp (Department of Neurology, University Medical Center Utrecht), Rob H. Lo (Department of Radiology, University Medical Center Utrecht), Ewoud J. van Dijk (Department of Neurology, Radboud University Medical Center, Nijmegen), Hieronymus D. Boogaarts (Department of Neurosurgery, Radboud University Medical Center, Nijmegen), Paul L.M. de Kort (Department of Neurology, Sint Elisabeth Hospital, Tilburg), Jo J.P. Peluso (Department of Radiology, Sint Elisabeth Hospital, Tilburg), Jan S.P. van den Berg (Department of Neurology, Isala Klinieken, Zwolle), Boudewijn A.A.M. van Hasselt (Department of Radiology, Isala Klinieken, Zwolle), Leo A.M. Aerden (Department of Neurology, Reinier de Graaf Gasthuis, Delft), René J. Dallinga (Department of Radiology, Reinier de Graaf Gasthuis, Delft), Maarten Uyttenboogaart (Department of Neurology, University Medical Center Groningen), Omid Eshghi (Department of Radiology, University Medical Center Groningen), Tobien H.C.M.L. Schreuder (Department of Neurology, Atrium Medical Center, Heerlen), Roel J.J.

Heijboer (Department of Radiology, Atrium Medical Center, Heerlen), Koos Keizer (Department of Neurology, Catharina Hospital, Eindhoven), Lonneke S.F. Yo (Department of Radiology, Catharina Hospital, Eindhoven), Heleen M. den Hertog (Department of Neurology, Medical Spectrum Twente, Enschede), Emiel J.C. Sturm (Department of Radiology, Medical Spectrum Twente, Enschede). Imaging assessment committee: Charles B.L.M. Majoie (Department of Radiology, Academic Medical Center, Amsterdam; chair), Wim H. van Zwam (Department of Radiology, Cardiovascular Research Institute Maastricht, Maastricht University Medical Center), Aad van der Lugt (Department of Radiology, Erasmus MC University Medical Center, Rotterdam), Geert J. Lycklama à Nijeholt (Department of Radiology, Haaglanden MC, The Hague), Marianne A.A. van Walderveen (Department of Radiology, Leiden University Medical Center), Marieke E.S. Sprengers (Department of Radiology, Academic Medical Center, Amsterdam), Sjoerd F.M. Jenniskens (Department of Radiology, Radboud University Medical Center, Nijmegen), René van den Berg (Department of Radiology, Academic Medical Center, Amsterdam), Albert J. Yoo (Department of Radiology, Texas Stroke Institute), Ludo F.M. Beenen (Department of Radiology), Stefan D. Roosendaal (Department of Radiology, Academic Medical Center, Amsterdam), Bas F.W. van der Kallen (Department of Radiology, Haaglanden MC, The Hague), Ido R. van den Wijngaard (Department of Radiology, Haaglanden MC, The Hague), Ad van Es (Department of Radiology, Erasmus MC University Medical Center, Rotterdam), Bart Emmer (Department of Radiology, Erasmus MC University Medical Center, Rotterdam), Jasper M. Martens (Department of Radiology, Rijnstate Hospital, Arnhem), Lonneke S.F. Yo (Department of Radiology, Catharina Hospital, Eindhoven), Jan Albert Vos (Department of Radiology, Sint Antonius Hospital, Nieuwegein), Joost Bot (Department of Radiology, VUMC, Amsterdam),

Pieter-Jan van Doormaal (Department of Radiology, Erasmus MC University Medical Center, Rotterdam), Alida Postma (Department of Radiology, Cardiovascular Research Institute Maastricht, Maastricht University Medical Center). Writing committee: Diederik W.J. Dippel (Department of Neurology, Erasmus MC University Medical Center, Rotterdam; chair), Aad van der Lugt (Department of Radiology, Erasmus MC University Medical Center, Rotterdam), Charles B.L.M. Majoie (Department of Radiology Academic Medical Center, Amsterdam), Yvo B.W.E.M. Roos (Department of Neurology, Academic Medical Center, Amsterdam), Robert J. van Oostenbrugge (Department of Neurology, Cardiovascular Research Institute Maastricht, Maastricht University Medical Center), Wim H. van Zwam (Department of Radiology, Cardiovascular Research Institute Maastricht, Maastricht University Medical Center), Geert J. Lycklama à Nijeholt (Department of Radiology, Haaglanden MC, The Hague), Jelis Boiten (Department of Neurology, Haaglanden MC, The Hague), Jan Albert Vos (Department of Radiology, Sint Antonius Hospital, Nieuwegein), Wouter J. Schonewille (Department of Neurology, Sint Antonius Hospital, Nieuwegein), Jeannette Hofmeijer (Department of Neurology, Rijnstate Hospital, Arnhem), Jasper M. Martens (Department of Radiology, Rijnstate Hospital, Arnhem), H. Bart van der Worp (Department of Neurology, University Medical Center Utrecht), Rob H. Lo (Department of Radiology, University Medical Center Utrecht). Adverse event committee: Robert J. van Oostenbrugge (Department of Neurology, Cardiovascular Research Institute Maastricht, Maastricht University Medical Center; chair), Jeannette Hofmeijer (Department of Neurology, Rijnstate Hospital, Arnhem), H. Zwenneke Flach (Department of Radiology, Isala Klinieken, Zwolle). Trial methodologist: Hester F. Lingsma (Public Health Department, Erasmus MC University Medical Center, Rotterdam). Research nurses/local trial coordinators: Naziha el

Ghannouti (Department of Neurology, Erasmus MC University Medical Center, Rotterdam), Martin Sterrenberg (Department of Neurology, Erasmus MC University Medical Center, Rotterdam), Corina Puppels (Department of Neurology, Sint Antonius Hospital, Nieuwegein), Wilma Pellikaan (Department of Neurology, Sint Antonius Hospital, Nieuwegein), Rita Sprengers (Department of Radiology, Academic Medical Center, Amsterdam), Marjan Elfrink (Department of Neurology, Rijnstate Hospital, Arnhem), Joke de Meris (Department of Neurology, Haaglanden MC, The Hague), Tamara Vermeulen (Department of Neurology, Haaglanden MC, The Hague), Annet Geerlings (Department of Neurology, Radboud University Medical Center, Nijmegen), Gina van Vemde (Department of Neurology, Isala Klinieken, Zwolle), Tiny Simons (Department of Neurology, Atrium Medical Center, Heerlen), Cathelijan van Rijswijk (Department of Neurology, Sint Elisabeth Hospital, Tilburg), Gert Messchendorp (Department of Neurology, University Medical Center Groningen), Hester Bongenaar (Department of Neurology, Catharina Hospital, Eindhoven), Karin Bodde (Department of Neurology, Reinier de Graaf Gasthuis, Delft), Sandra Kleijn (Department of Neurology, Medical Spectrum Twente, Enschede), Jasmijn Lodico (Department of Neurology, Medical Spectrum Twente, Enschede), Hanneke Droste (Department of Neurology, Medical Spectrum Twente, Enschede), M. Wollaert (Department of Neurology, Cardiovascular Research Institute Maastricht, Maastricht University Medical Center), D. Jeurissen (Department of Neurology, Cardiovascular Research Institute Maastricht, Maastricht University Medical Center), Erna Bos Downloaded from <http://ahajournals.org> by on October 5, 2018 Goldhoorn et al Prestroke Dependence in Thrombectomy for Stroke 2413 (Department of Neurology, Leiden University Medical Center), Yvonne Drabbe (Department of Neurology, HAGA Hospital, The Hague), Berber Zweedijk (Department of Neurology, University Medical

Center Utrecht), Mostafa Khalilzada (Department of Neurology, Haga Hospital, The Hague). PhD/ medical students: Esmee Venema (Public Health Department, Erasmus MC University Medical Center, Rotterdam), Vicky Chalos (Department of Neurology, Erasmus MC University Medical Center, Rotterdam), Kars J. Compagne (Department of Radiology, Erasmus MC University Medical Center, Rotterdam), Ralph R. Geuskens (Department of Radiology, Academic Medical Center, Amsterdam), Tim van Straaten (Department of Neurology, Radboud University Medical Center, Nijmegen), Saliha Ergezen (Department of Neurology, Erasmus MC University Medical Center, Rotterdam), Roger R.M. Harmsma (Department of Neurology, Erasmus MC University Medical Center, Rotterdam), Daan Muijres (Department of Neurology, Erasmus MC University Medical Center, Rotterdam), Anouk de Jong (Department of Neurology, Erasmus MC University Medical Center, Rotterdam), Wouter Hinseveld (Department of Neurology, Sint Antonius Hospital, Nieuwegein), Olvert A. Berkhemer (Department of Neurology, Erasmus MC University Medical Center, Rotterdam), Anna M.M. Boers (Department of Radiology, Academic Medical Center, Amsterdam), J. Huguet (Department of Radiology, Academic Medical Center, Amsterdam), P.F.C. Groot (Department of Radiology, Academic Medical Center, Amsterdam), Marieke A. Mens (Department of Radiology, Academic Medical Center, Amsterdam), Katinka R. van Kranendonk (Department of Radiology, Academic Medical Center, Amsterdam), Kilian M. Treurniet (Department of Radiology, Academic Medical Center, Amsterdam), Manon Kappelhof (Department of Radiology, Academic Medical Center, Amsterdam), Manon L. Tolhuijsen (Department of Radiology, Academic Medical Center, Amsterdam), Heitor Alves (Department of Radiology, Academic Medical Center, Amsterdam).

**Supplemental Figure I. Flow chart of the patient selection process.**

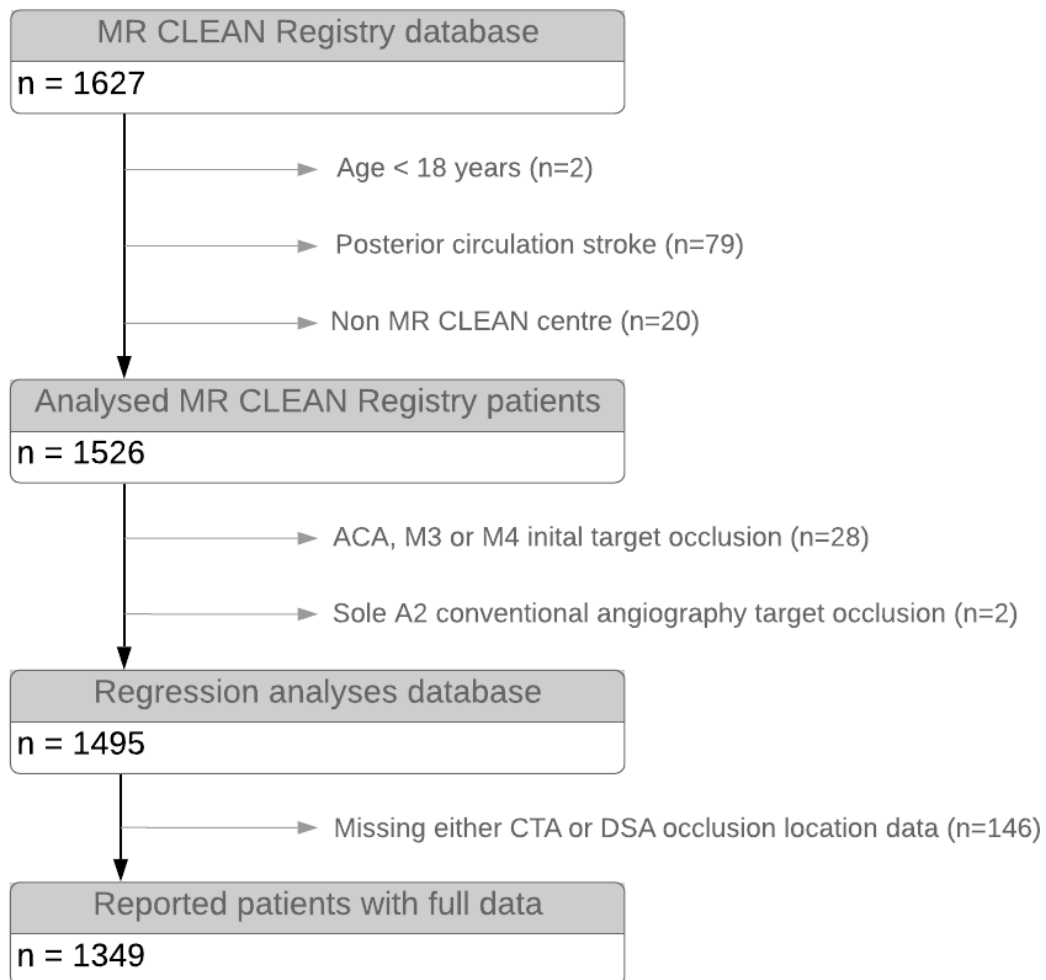

Abbreviations: ACA: anterior cerebral artery; CTA: computed tomography angiography; DSA: digital subtraction angiography.

**Supplemental Figure II. Functional outcome defined by the modified Ranking scale score per group.**

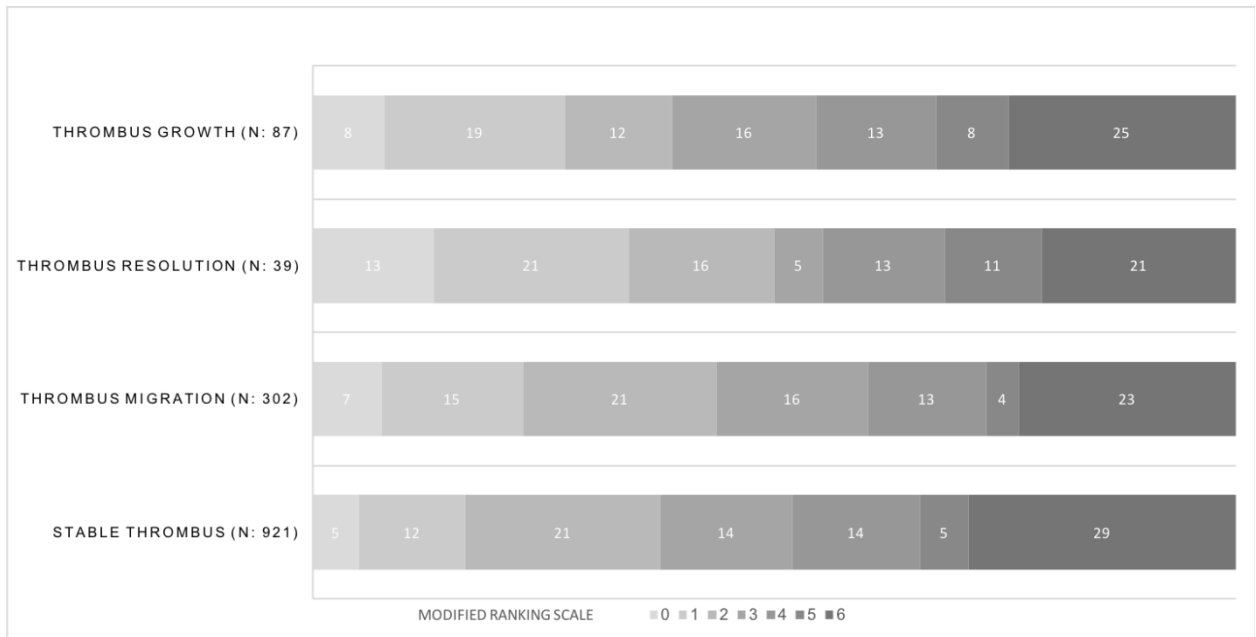

Supplement: str-50-3156-s001.pdf [file str-50-3156-s001.pdf]
